# Supplementary figures and images for: An atomistic explanation of the ethanol–water azeotrope
Source: Royal Society of Chemistry journal article supplement (doi:10.1039/d2cp03145k), 2022-01-01

Int. Spectrum - Int. Fitted Polyn.

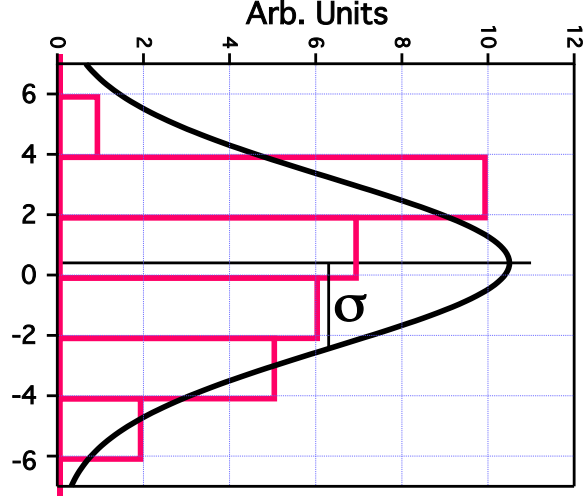

Int. Spectrum - Int. Fitted Polyn.

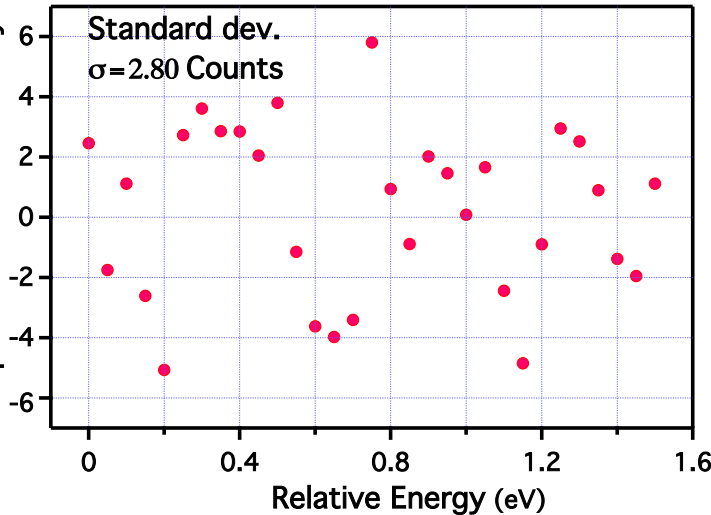

Supplement: d2cp03145k2.zip [file d2cp03145k2.zip]

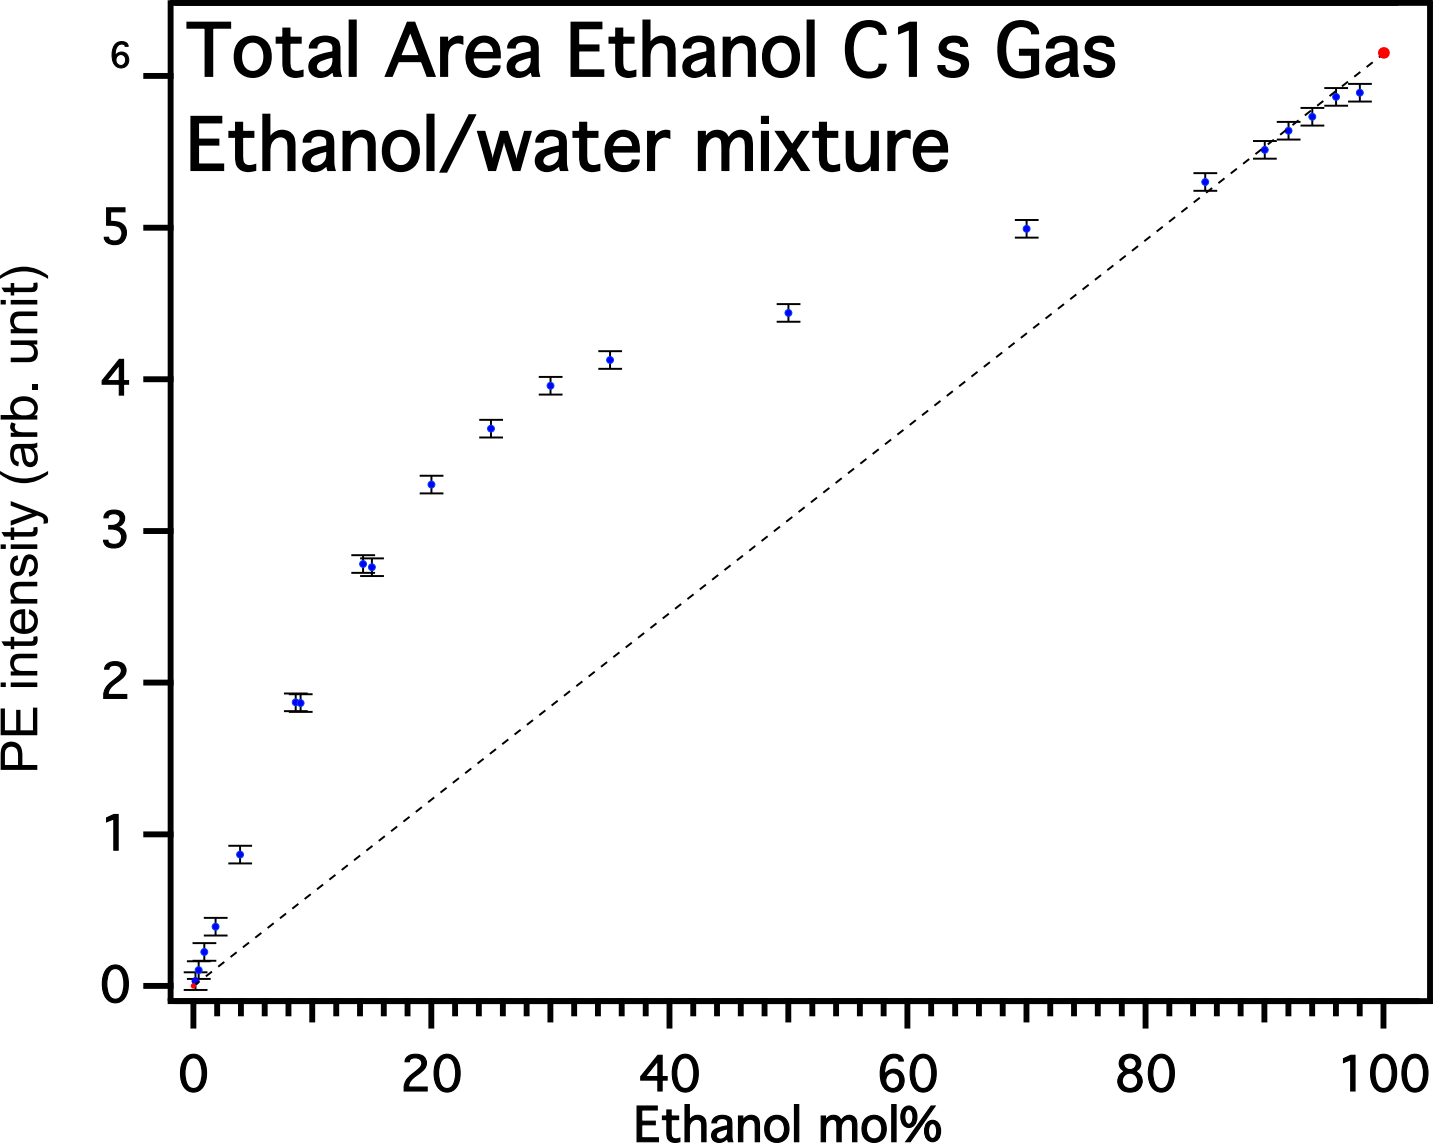

Supplement: d2cp03145k2.zip [file d2cp03145k2.zip]

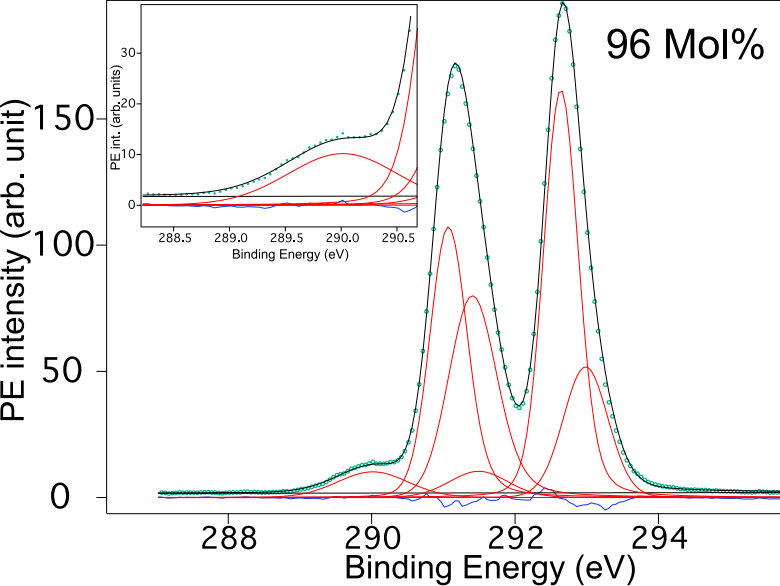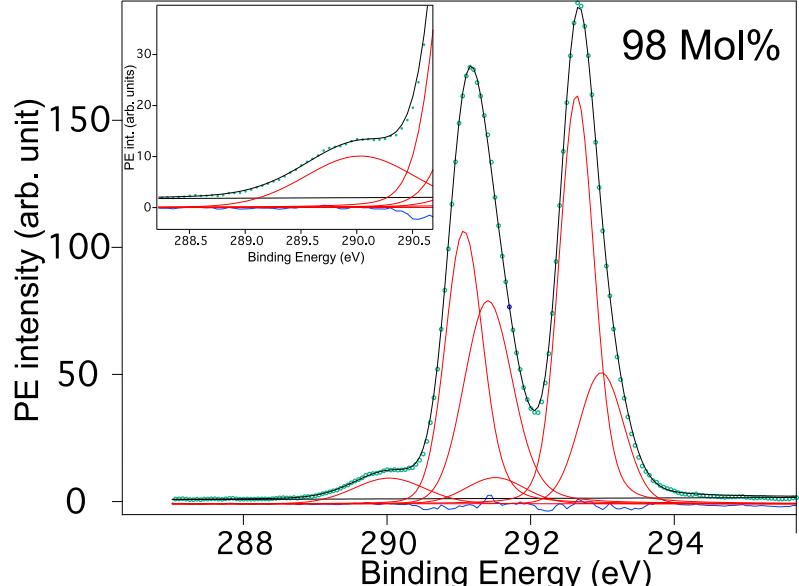

Supplement: d2cp03145k2.zip [file d2cp03145k2.zip]

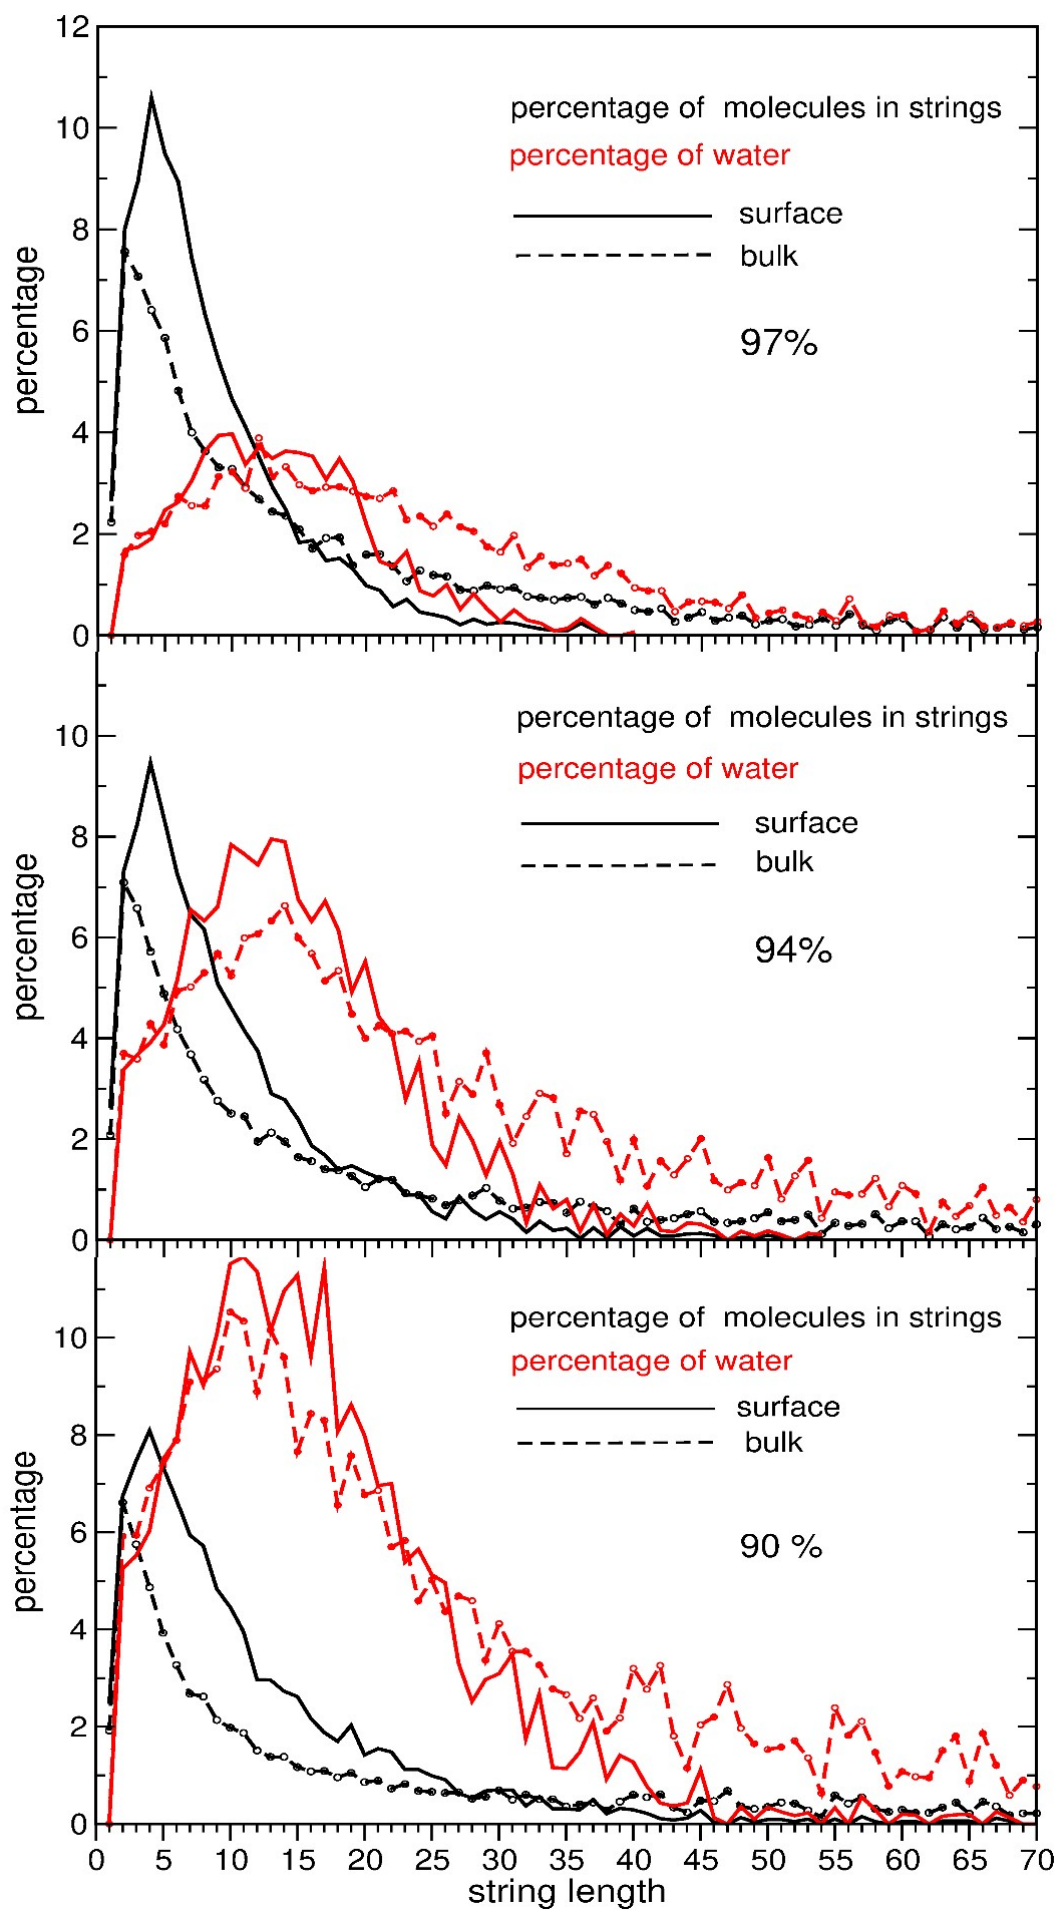

Supplement: d2cp03145k2.zip [file d2cp03145k2.zip]

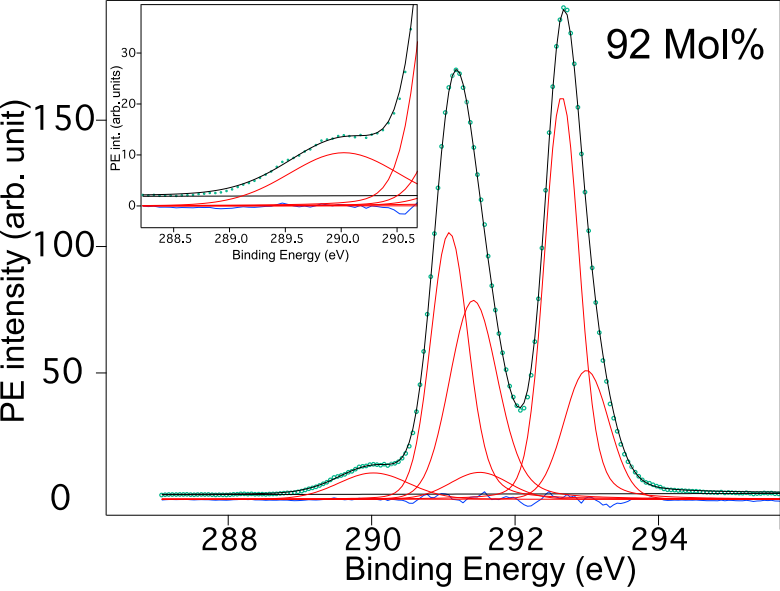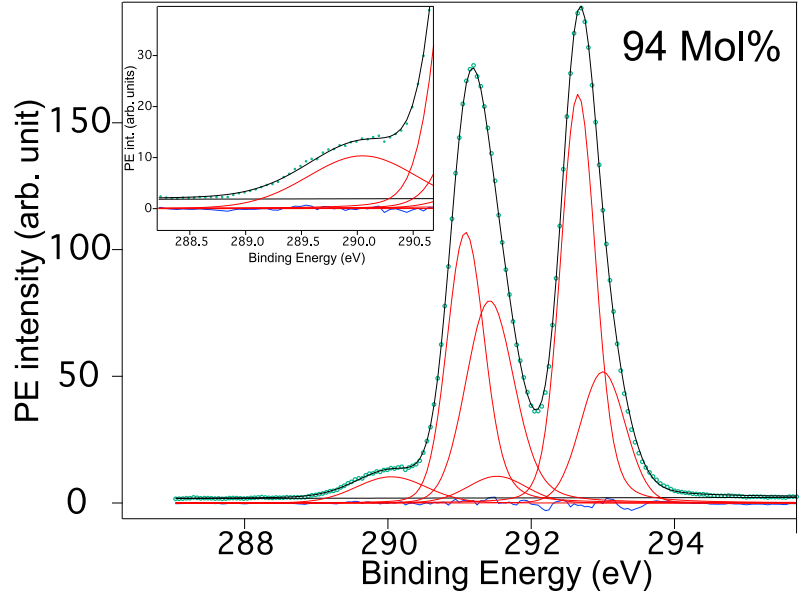

Supplement: d2cp03145k2.zip [file d2cp03145k2.zip]

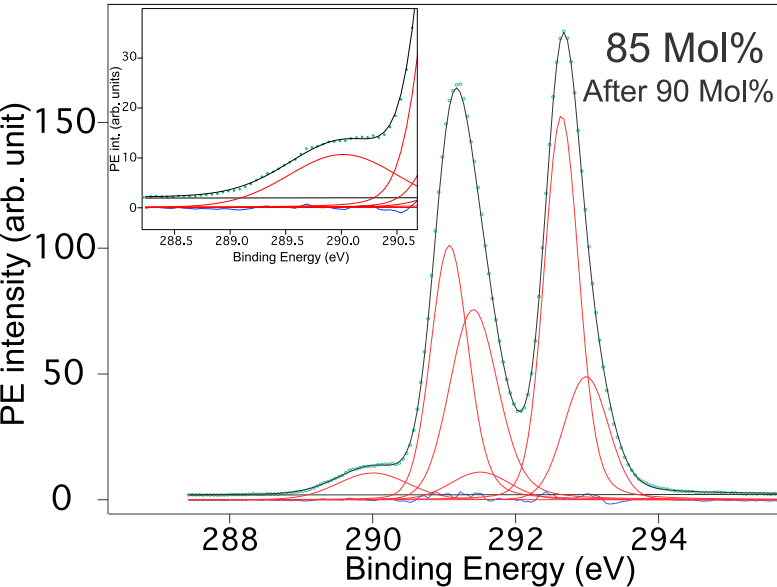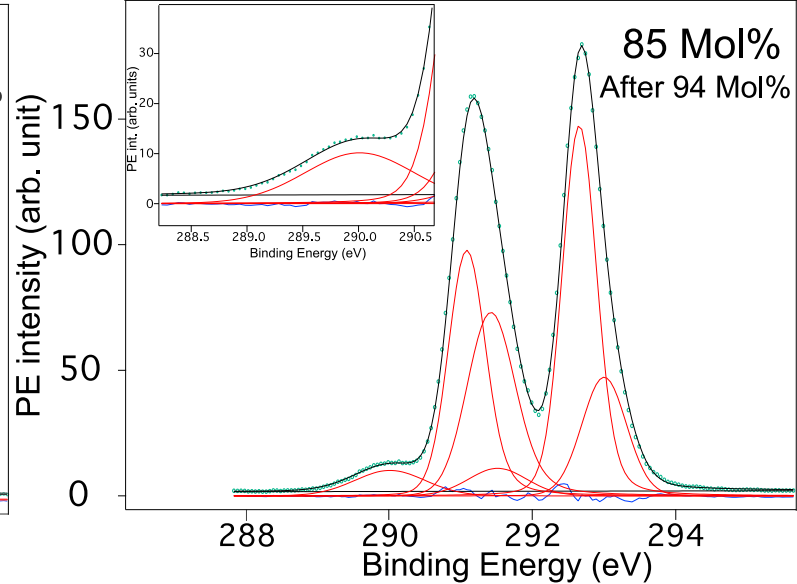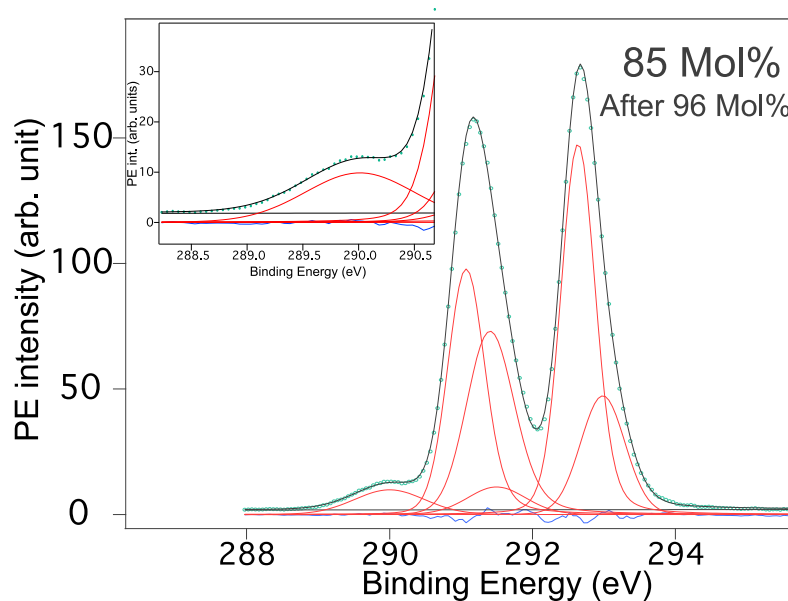

Supplement: d2cp03145k2.zip [file d2cp03145k2.zip]

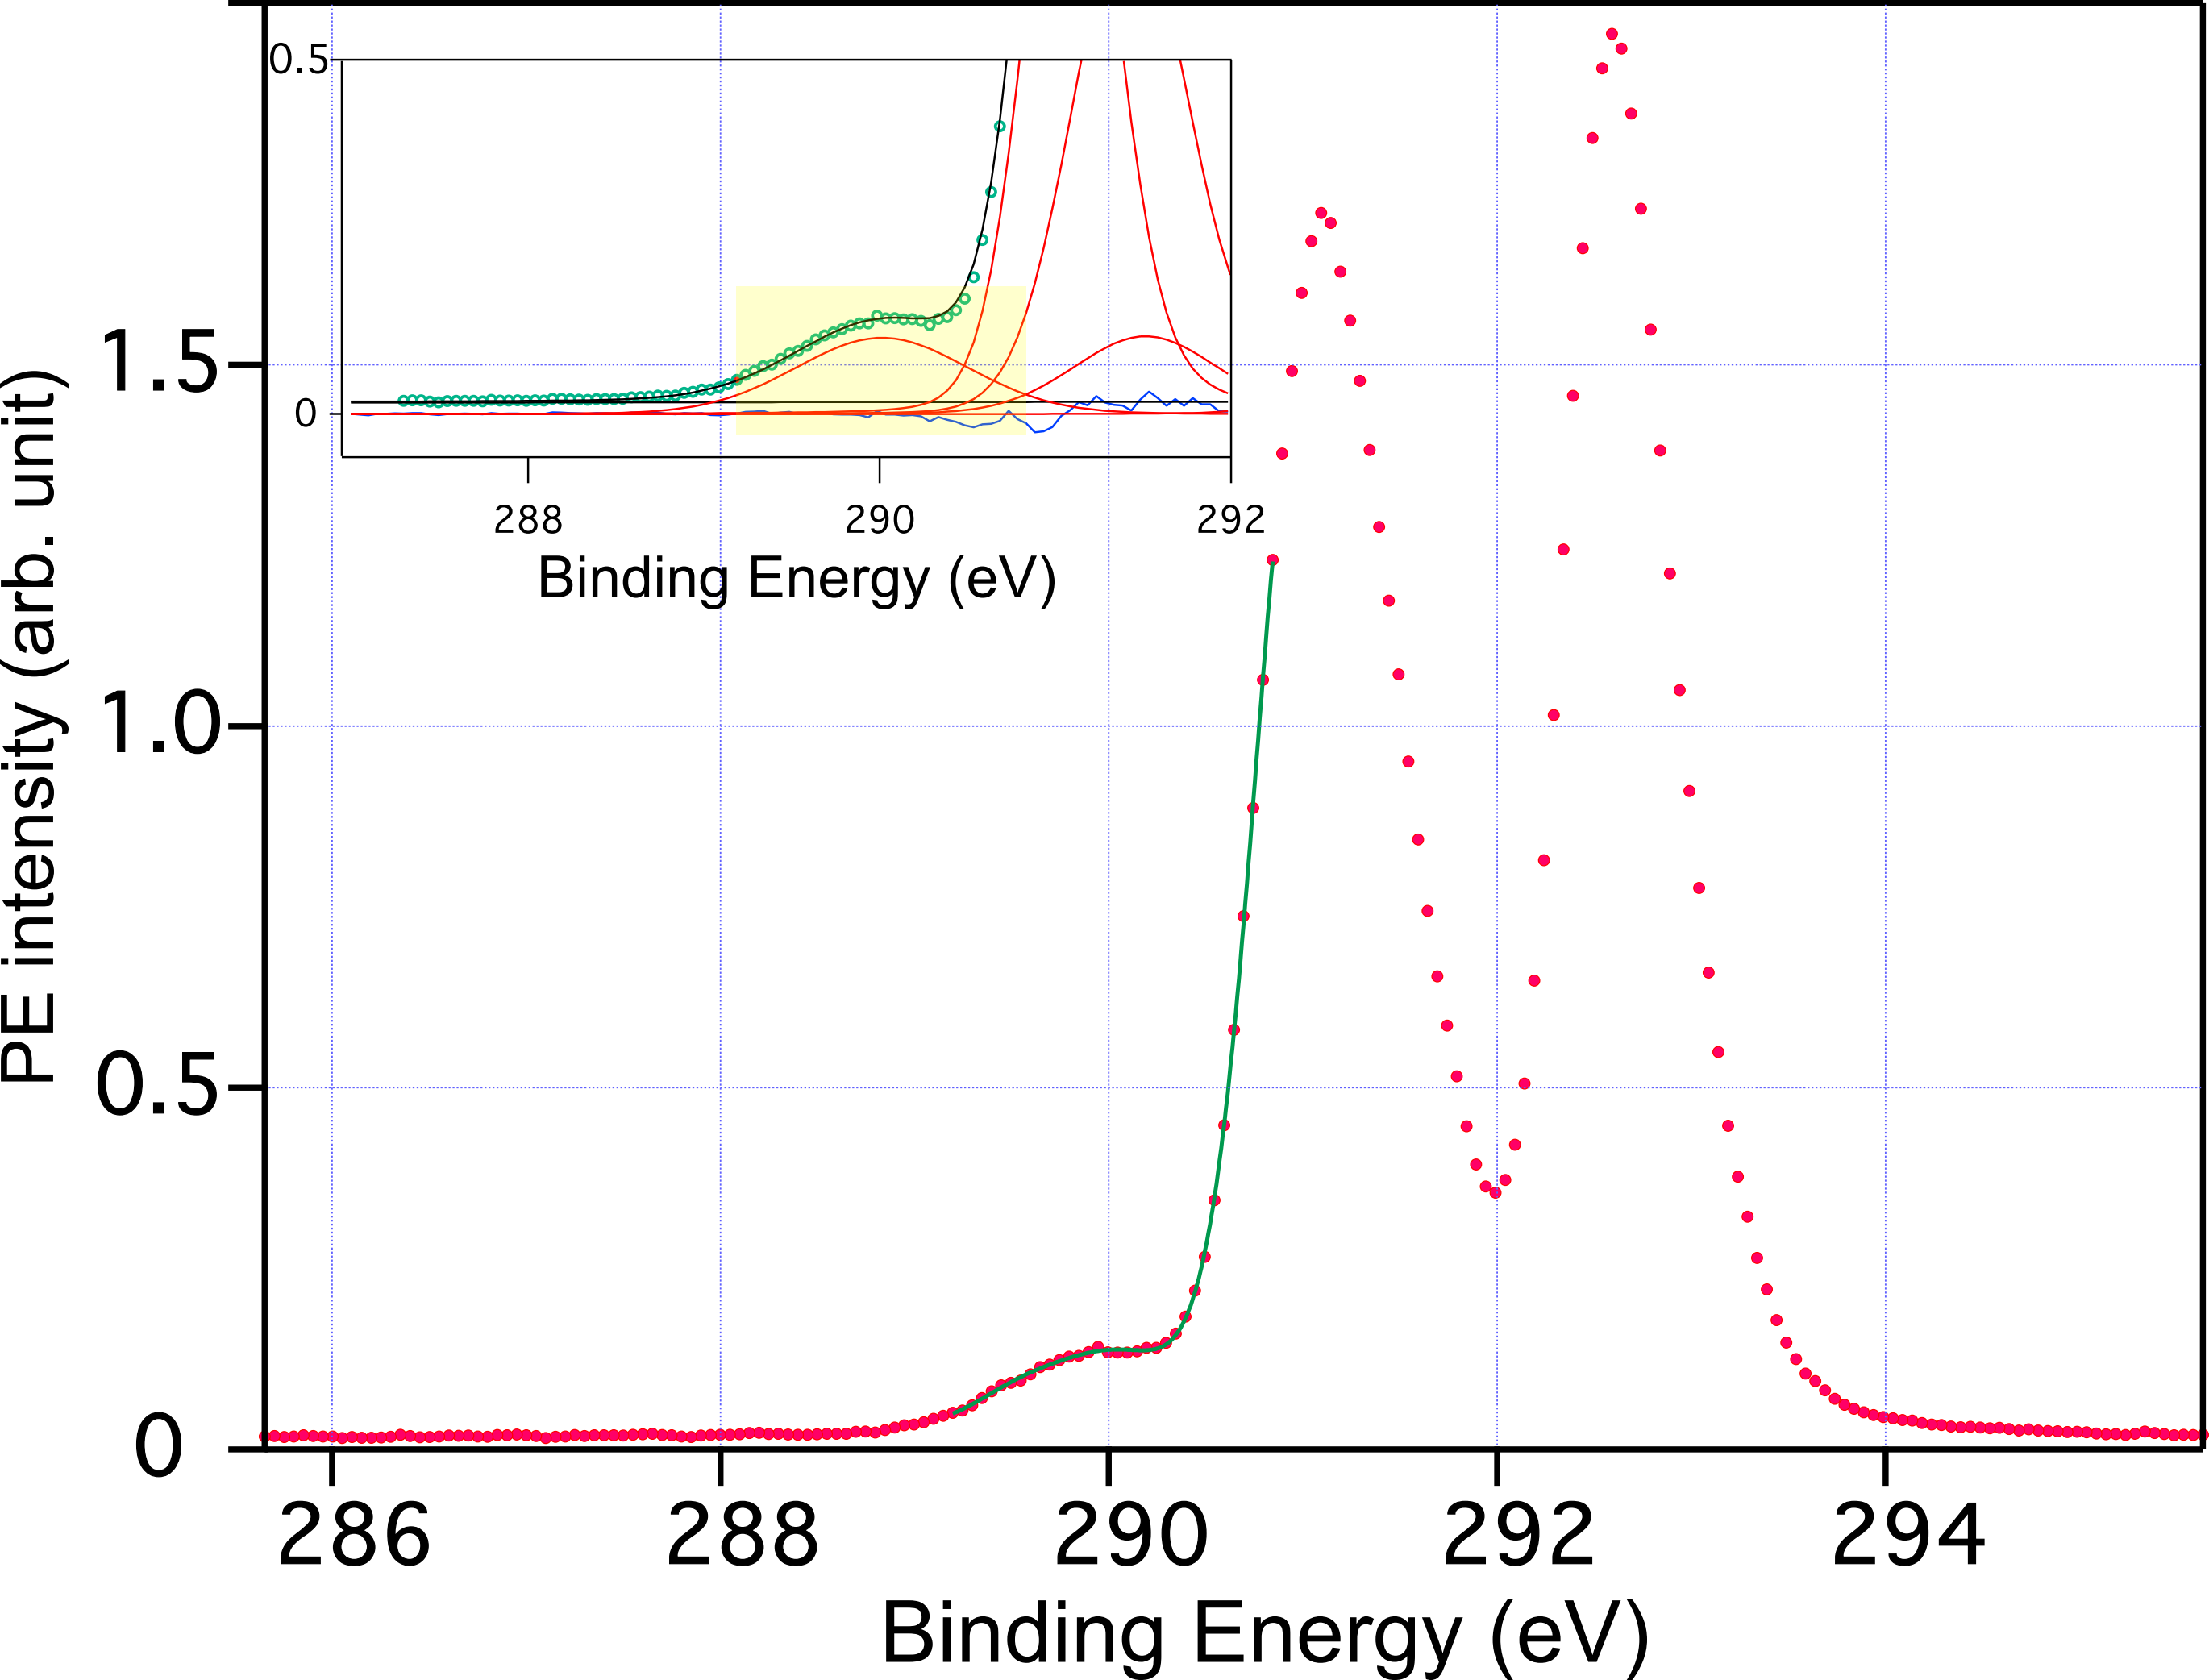

Supplement: d2cp03145k2.zip [file d2cp03145k2.zip]

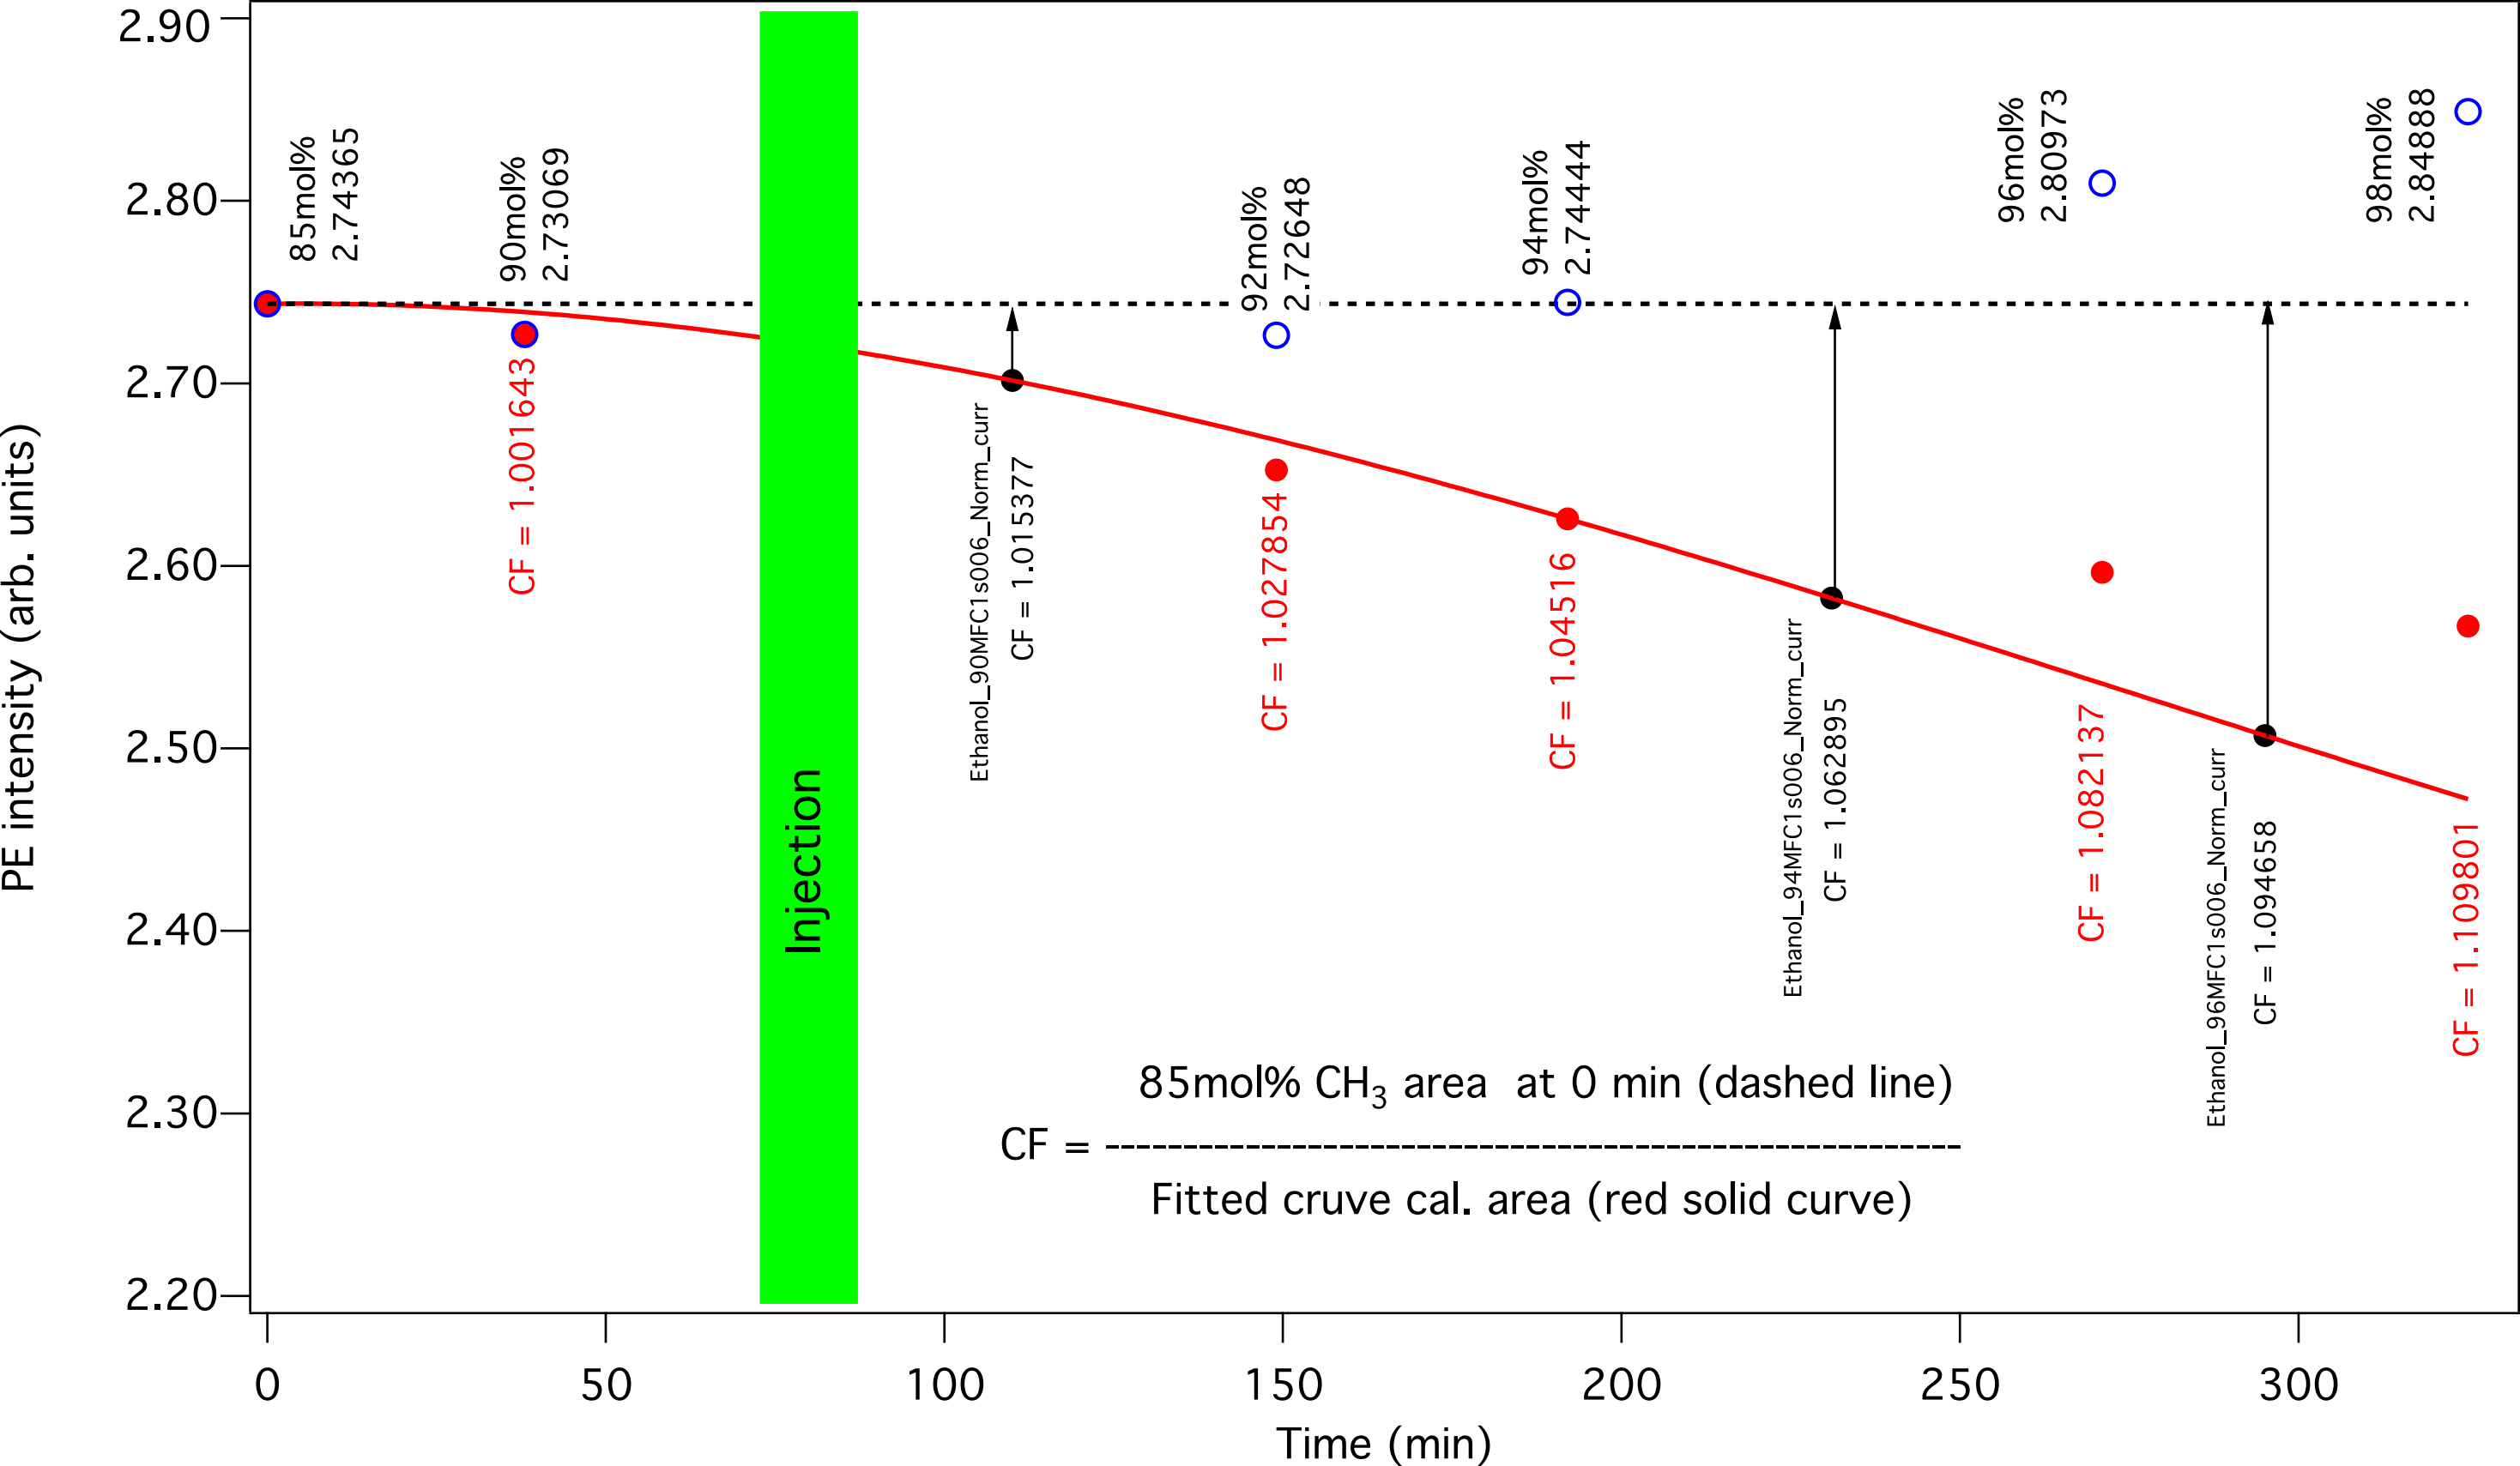

Supplement: d2cp03145k2.zip [file d2cp03145k2.zip]
